# Supplementary material for: Evaluation of an alternative fluorinated chitosan as a QuEChERS adsorbent for pesticide residue analysis in apple samples
Source: Royal Society of Chemistry journal article supplement (doi:10.1039/c9ay00769e), 2019-01-01
Supplement: c9ay00769e1.pdf [file c9ay00769e1.pdf]

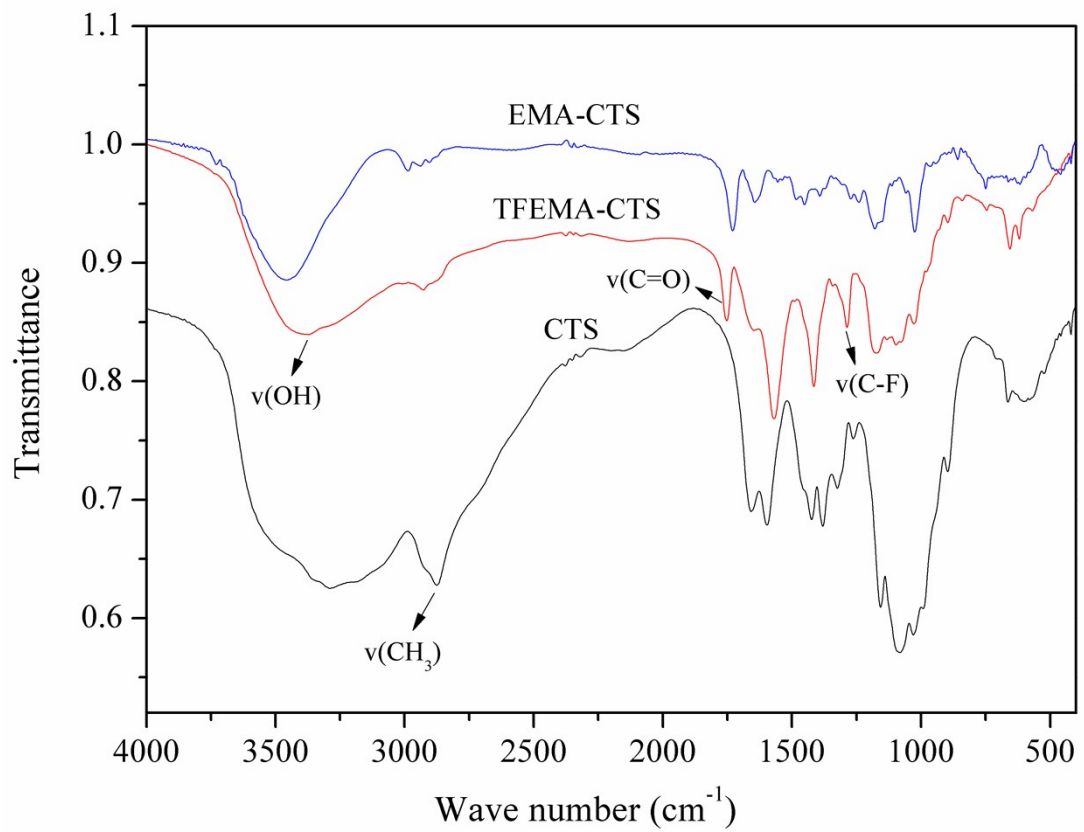

Fig.S1 FT-IR spectrum of CTS, EMA-CTS and TFEMA-CTS

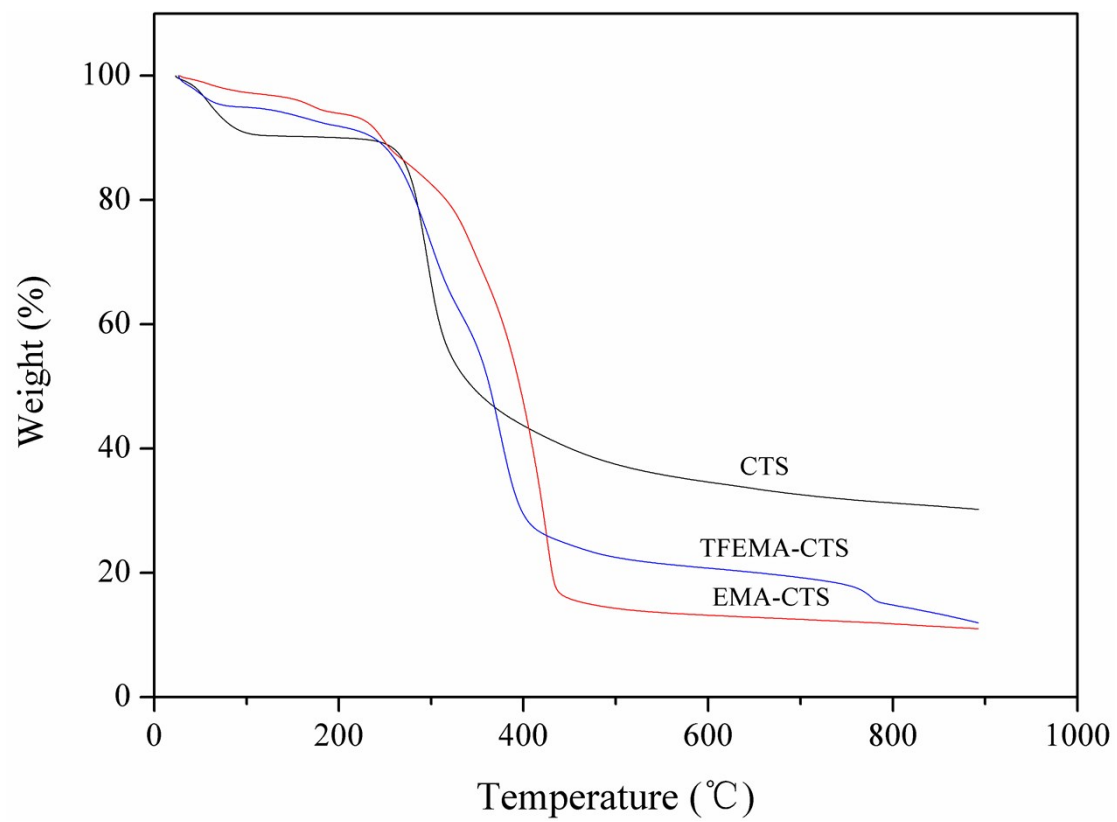

Fig.S2 The TGA curves of CTS, EMA-CTS and TFEMA-CTS

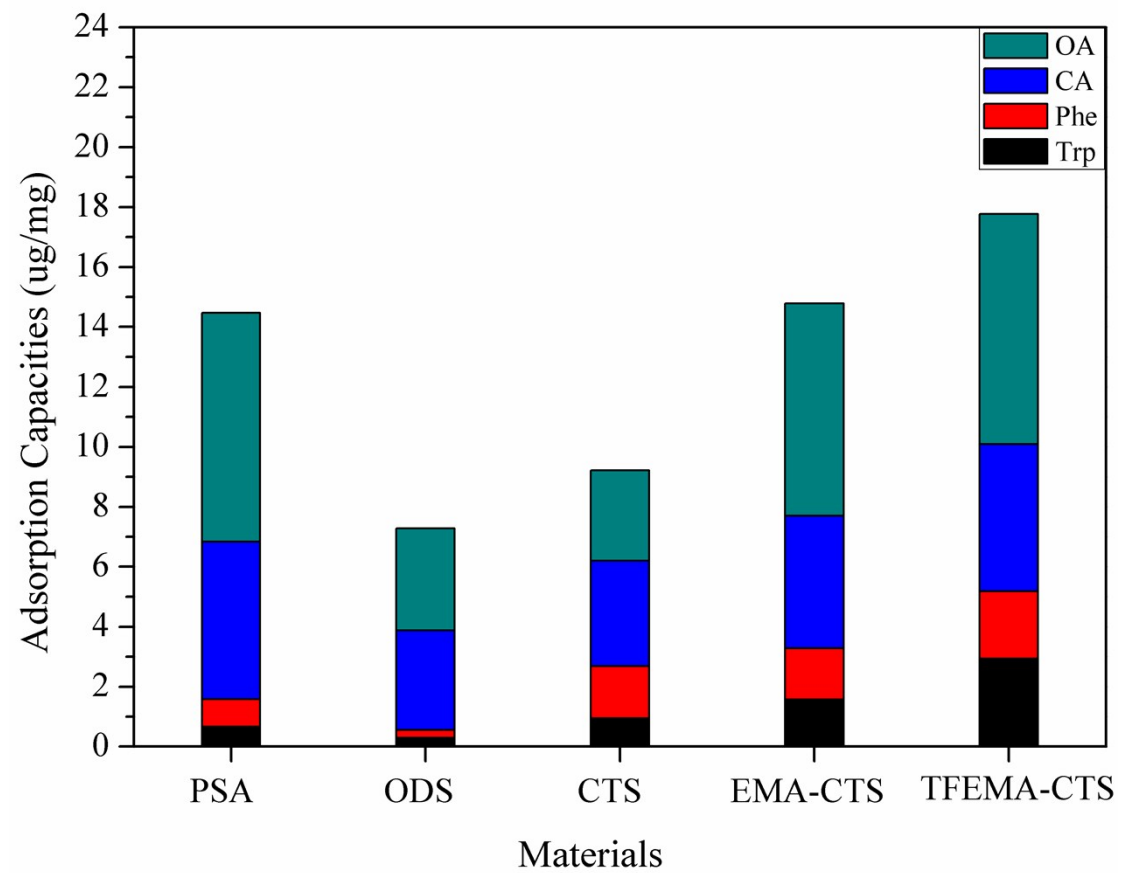

Fig.S3 Adsorption capacities of two kinds of organic acids and amino acids by five adsorbents

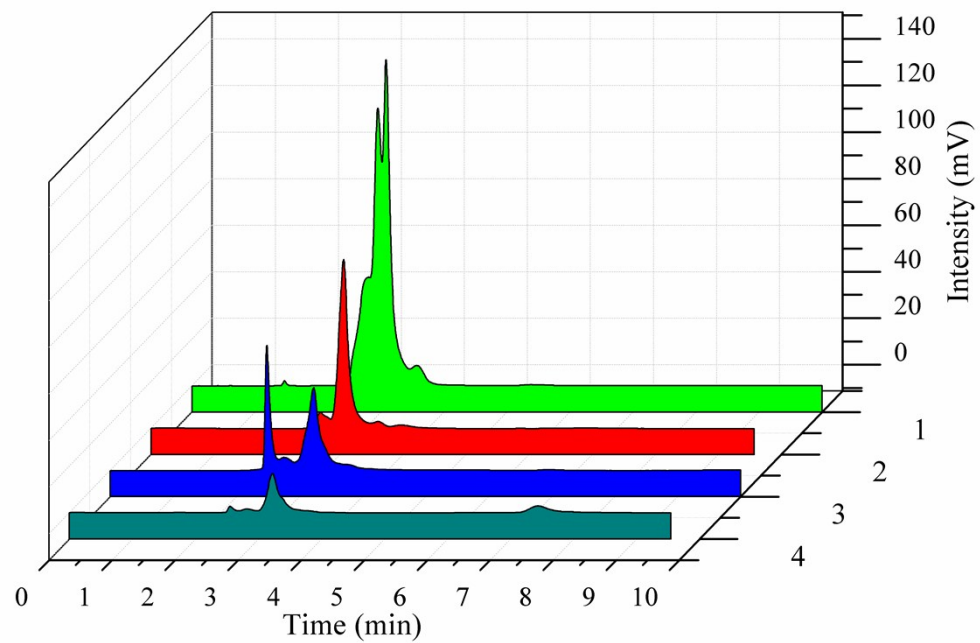

Fig.S4 The chromatograms of different samples before and after QuEChERS method with TFEMA-CTS: 1, tea sample before clean-up; 2, tea sample after clean-up; 3, milk sample before clean-up; 4, milk sample after clean-up

Table S1 Elemental composition of CTS, EMA-CTS and TFEMA-CTS

| Materials | Elemental composition (%) |      |       |      |
|-----------|---------------------------|------|-------|------|
|           | C                         | N    | O     | F    |
| CTS       | 57.28                     | 6.14 | 36.58 | 0    |
| EMA-CTS   | 69.97                     | 2.85 | 27.18 | 0    |
| TFEMA-CTS | 64.72                     | 1.64 | 27.96 | 5.68 |

Table S2 Equations for regression curves, in solvent and blank matrix, determination coefficient, method LOD and LOQ

| Analytes | Regression equation in pure solvent       |                | Regression equation in apple blank samples |                | Linear range<br>mg/kg | Instrumental                |                             |
|----------|-------------------------------------------|----------------|--------------------------------------------|----------------|-----------------------|-----------------------------|-----------------------------|
|          | $Y=aX+b$                                  | R <sup>2</sup> | $Y=aX+b$                                   | R <sup>2</sup> |                       | LOD<br>( $\mu\text{g/kg}$ ) | LOQ<br>( $\mu\text{g/kg}$ ) |
| DMP      | $Y=2.47 \times 10^4 X + 7.66 \times 10^3$ | 0.9996         | $Y=2.14 \times 10^4 X + 5.01 \times 10^4$  | 0.9854         | 0.1-200               | 1.90                        | 6.10                        |
| DAP      | $Y=1.97 \times 10^4 X + 9.15 \times 10^3$ | 0.9997         | $Y=1.93 \times 10^4 X - 4.12 \times 10^4$  | 0.9958         | 0.1-200               | 3.00                        | 9.80                        |
| MTL      | $Y=1.14 \times 10^4 X + 3.89 \times 10^3$ | 0.9995         | $Y=1.13 \times 10^4 X - 9.68 \times 10^3$  | 0.9996         | 1-200                 | 6.80                        | 22.0                        |
| Di-BP    | $Y=1.84 \times 10^4 X + 6.50 \times 10^3$ | 0.9997         | $Y=1.97 \times 10^4 X - 1.84 \times 10^4$  | 0.9995         | 0.1-200               | 4.40                        | 4.80                        |

Table S3 Comparison of the results obtained with this new adsorbent with other adsorbents reported in the literature.

| Analytes | Adsorbents                                   | Linear rage     | RSD (%) | Recovery (%) | Reference |
|----------|----------------------------------------------|-----------------|---------|--------------|-----------|
| DMP      | PSA +C <sub>18</sub>                         | 5-500 µg/L      | 6.80    | 84.8         | [10]      |
|          | Acrylamide modified PSA analogue             | 0.1-100.0 g/mL  | 2.30    | 84.10        | [11]      |
|          | PSA +C <sub>18</sub>                         | 20–500 µg/L     | 1.81    | 71.36        | [12]      |
|          | TFEMA-CTS                                    | 0.1-200.0 mg/kg | 0.50    | 98.82        | This work |
| DAP      | PSA +C <sub>18</sub>                         | 20–500 µg/L     | 3.27    | 84.84        | [12]      |
|          | PSA + MgSO <sub>4</sub>                      | 10–500 µg/L     | 8.70    | 86.51        | [13]      |
|          | PSA                                          | 1–250 µg/L      | 4.0     | 98.0         | [14]      |
|          | TFEMA-CTS                                    | 0.1-200.0 mg/kg | 1.70    | 96.9         | This work |
| MTL      | PSA-kit-04A                                  | 0.01–1000 ng/mL | /       | 65.0         | [15]      |
|          | PSA+ C <sub>18</sub> +GCB+ MgSO <sub>4</sub> | 0.01-1.00 mg/L  | 5.78    | 93.5         | [16]      |
|          | TFEMA-CTS                                    | 0.1-200.0 mg/kg | 114.3   | 2.60         | This work |
| Di-BP    | PSA/C <sub>18</sub>                          | 5-500 µg/L      | 7.4     | 99.3         | [10]      |
|          | PSA/C <sub>18</sub>                          | 20–500 µg/L     | 3.35    | 81.01        | [12]      |
|          | PSA + MgSO <sub>4</sub>                      | 10–500 µg/L     | 8.90    | 85.10        | [13]      |
|          | TFEMA-CTS                                    | 0.1-200.0 mg/kg | 0.60    | 100.5        | This work |
